# Supplementary material for: Interaction Research on the Antiviral Molecule Dufulin Targeting on Southern Rice Black Streaked Dwarf Virus P9-1 Nonstructural Protein
Source: PubMed Central journal article supplement (PMC4379580; doi:10.3390/v7031454), 2015-03-23
Supplement: viruses-07-01454-s001.pdf [file viruses-07-01454-s001.pdf]

# Supplementary Information

## Supplementary File 1: Amino acid sequence of SRBSDV-GZDYun-P9-1.

MADLERRTFGSYKIEELTIRNDQPTRNTNLSLSQSTENRLSTKKIPLDDGIFELLYLIDGTN  
FNKTCYCGFNYSHLPLNERDFNIASLYVRENFEICTDQLDLANYVRQPNISIKSPDFTVCLEYV  
LKTVVESESSTKDQKDDDESQKPTSTDSTKNEQEKKFVEMSLPLLNRESEESLTEEILEGEGAV  
VNVLKLFIKGFMLHGENPNSYDRQLTVEKYRPLLVSIVGYEYLVGTTVPEKKINHIYYQLATF  
DNYPFDLLRFQLSSLISTPTSILERITKEGLFKIITSSTLRGATRQTVLFRGINGSESFLNIKRYRRF  
RTRIVGNADSVIKSDFSSLKLDV\*.

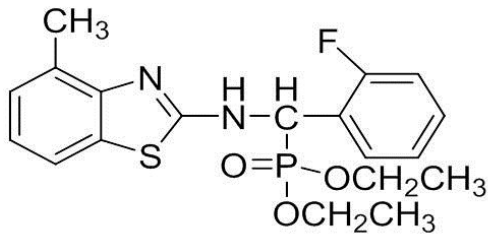

**DFL**

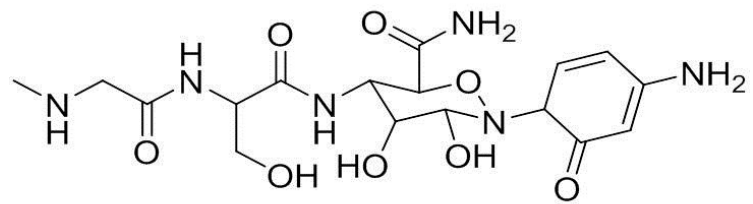

**Ningnanmycin**

**Figure S1.** Chemical structures of DFL and NNM.

© 2015 by the authors; licensee MDPI, Basel, Switzerland. This article is an open access article distributed under the terms and conditions of the Creative Commons Attribution license (<http://creativecommons.org/licenses/by/4.0/>).
